# Supplementary material for: Comparative Genomic Analysis Discloses Differential Distribution of Antibiotic Resistance Determinants between Worldwide Strains of the Emergent ST213 Genotype of Salmonella Typhimurium
Source: MDPI journal article supplement (doi:10.3390/antibiotics11070925), 2022-07-09
Supplement: s1 [file s1]

**Supplementary Table S1.** Data of the analyzed genomes in the present work.

| No. | Sample      | Country   | Year | Source <sup>1</sup> | Accession<br>No./Assembly Barcode |
|-----|-------------|-----------|------|---------------------|-----------------------------------|
| 1   | AUS01H_2017 | Australia | 2017 | Human               | SRR14143603                       |
| 2   | AUS02H_2018 | Australia | 2018 | Human               | SRR14145155                       |
| 3   | AUS03H_2006 | Australia | 2006 | Human               | SRR5090724                        |
| 4   | AUS04_2021  | Australia | 2021 | ND/Others           | SAL_PC2750AA_AS                   |
| 5   | BEL01H_2020 | Belgium   | 2020 | Human               | ERR4775375                        |
| 6   | CAN01H_2009 | Canada    | 2009 | Human               | SRR12712089                       |
| 7   | CAN02H_2018 | Canada    | 2018 | Human               | SRR13426370                       |
| 8   | CAN03H_2011 | Canada    | 2011 | Human               | SRR13605059                       |
| 9   | CAN04H_2008 | Canada    | 2008 | Human               | SRR13769784                       |
| 10  | CAN05H_2017 | Canada    | 2017 | Human               | SRR13827060                       |
| 11  | CAN06H_2017 | Canada    | 2017 | Human               | SRR13849853                       |
| 12  | CAN07H_2017 | Canada    | 2017 | Human               | SRR13952785                       |
| 13  | CAN08H_2017 | Canada    | 2017 | Human               | SRR13952800                       |
| 14  | CAN09H_2018 | Canada    | 2018 | Human               | SRR14102894                       |
| 15  | CAN10H_2018 | Canada    | 2018 | Human               | SRR14102906                       |
| 16  | CAN11H_2018 | Canada    | 2018 | Human               | SRR14767203                       |
| 17  | CAN19H_2016 | Canada    | 2016 | Human               | SRR15242716                       |
| 18  | CAN12H_2017 | Canada    | 2017 | Human               | SRR15242717                       |
| 19  | CAN13H_2015 | Canada    | 2015 | Human               | SRR15242758                       |
| 20  | CAN14H_2016 | Canada    | 2016 | Human               | SRR15242930                       |
| 21  | CAN15H_2014 | Canada    | 2014 | Human               | SRR15242943                       |
| 22  | CAN16H_2014 | Canada    | 2014 | Human               | SRR15242946                       |
| 23  | CAN17H_2008 | Canada    | 2008 | Human               | SAL_KC5843AA_AS                   |
| 24  | CAN18H_2010 | Canada    | 2010 | Human               | SAL_KC5864AA_AS                   |
| 25  | CAN21H_2018 | Canada    | 2018 | Human               | SAL_OC2346AA_AS                   |
| 26  | CAN20H_2017 | Canada    | 2017 | Human               | SAL_RC8451AA_AS                   |
| 27  | DEN01H_2002 | Denmark   | 2002 | Human               | ERR2719681                        |
| 28  | DEN02H_2011 | Denmark   | 2011 | Human               | ERR2729121                        |
| 29  | DEN04H_2017 | Denmark   | 2017 | Human               | ERR2849935                        |
| 30  | DEN03H_2009 | Denmark   | 2009 | Human               | ERR2729149                        |
| 31  | DEN05H_2009 | Denmark   | 2009 | Human               | ERR3060821                        |
| 32  | DEN06H_2008 | Denmark   | 2008 | Human               | ERR3901222                        |
| 33  | FRA01H_2019 | France    | 2019 | Human               | SAL_MC3552AA_AS                   |
| 34  | FRA02H_2019 | France    | 2019 | Human               | SAL_MC3509AA_AS                   |
| 35  | IND01F_2011 | India     | 2011 | Food                | SRR1107438                        |
| 36  | IND02F_2010 | India     | 2010 | Food                | SRR1300736                        |
| 37  | IND03F_2015 | India     | 2015 | Food                | SRR2029592                        |
| 38  | IRE01H_2007 | Ireland   | 2007 | Human               | ERR2693630                        |
| 39  | IRE02H_2016 | Ireland   | 2016 | Human               | SAL_OA1032AA_AS                   |
| 40  | MEX26H_2003 | Mexico    | 2003 | Human               | ERR2693961                        |
| 41  | MEX38H_2004 | Mexico    | 2004 | Human               | ERR2719629                        |

|    |             |        |      |             |             |
|----|-------------|--------|------|-------------|-------------|
| 42 | MEX40H_2003 | Mexico | 2003 | Human       | ERR2719652  |
| 43 | MEX01B_2004 | Mexico | 2004 | Bovine      | ERR2719833  |
| 44 | MEX56R_2019 | Mexico | 2019 | Water/River | SRR11016193 |
| 45 | MEX57R_2019 | Mexico | 2019 | Water/River | SRR11028646 |
| 46 | MEX58R_2019 | Mexico | 2019 | Water/River | SRR11028649 |
| 47 | MEX05D_2019 | Mexico | 2019 | Water/Dam   | SRR11029506 |
| 48 | MEX06D_2019 | Mexico | 2019 | Water/Dam   | SRR11029518 |
| 49 | MEX07D_2019 | Mexico | 2019 | Water/Dam   | SRR11029520 |
| 50 | MEX59R_2019 | Mexico | 2019 | Water/River | SRR11029522 |
| 51 | MEX08D_2019 | Mexico | 2019 | Water/Dam   | SRR11029523 |
| 52 | MEX60R_2019 | Mexico | 2019 | Water/River | SRR11029526 |
| 53 | MEX09D_2019 | Mexico | 2019 | Water/Dam   | SRR11029528 |
| 54 | MEX10D_2019 | Mexico | 2019 | Water/Dam   | SRR11029530 |
| 55 | MEX11F_2005 | Mexico | 2005 | Food        | SRR6010020  |
| 56 | MEX12F_2004 | Mexico | 2004 | Food        | SRR9017255  |
| 57 | MEX53_2004  | Mexico | 2004 | ND/Others   | SRR9099710  |
| 58 | MEX13F_2004 | Mexico | 2004 | Food        | SRR9102687  |
| 59 | MEX54_2004  | Mexico | 2004 | ND/Others   | SRR9102691  |
| 60 | MEX55_2004  | Mexico | 2004 | ND/Others   | SRR9102693  |
| 61 | MEX24H_2003 | Mexico | 2003 | Human       | ERR2693572  |
| 62 | MEX25H_2005 | Mexico | 2005 | Human       | ERR2693575  |
| 63 | MEX27H_2005 | Mexico | 2005 | Human       | ERR2693974  |
| 64 | MEX61S_2003 | Mexico | 2003 | Swine       | ERR2693980  |
| 65 | MEX28H_2003 | Mexico | 2003 | Human       | ERR2693981  |
| 66 | MEX29H_2003 | Mexico | 2003 | Human       | ERR2710803  |
| 67 | MEX30H_2004 | Mexico | 2004 | Human       | ERR2710805  |
| 68 | MEX31H_2002 | Mexico | 2002 | Human       | ERR2710819  |
| 69 | MEX32H_2003 | Mexico | 2003 | Human       | ERR2710835  |
| 70 | MEX33H_2004 | Mexico | 2004 | Human       | ERR2710854  |
| 71 | MEX34H_2003 | Mexico | 2003 | Human       | ERR2710856  |
| 72 | MEX35H_2003 | Mexico | 2003 | Human       | ERR2710865  |
| 73 | MEX36H_2003 | Mexico | 2003 | Human       | ERR2710869  |
| 74 | MEX37H_2004 | Mexico | 2004 | Human       | ERR2710884  |
| 75 | MEX39H_2003 | Mexico | 2003 | Human       | ERR2719641  |
| 76 | MEX41H_2004 | Mexico | 2004 | Human       | ERR2719677  |
| 77 | MEX42H_2004 | Mexico | 2004 | Human       | ERR3482042  |
| 78 | MEX62S_2003 | Mexico | 2003 | Swine       | ERR3482056  |
| 79 | MEX43H_2002 | Mexico | 2002 | Human       | ERR3482104  |
| 80 | MEX44H_2007 | Mexico | 2007 | Human       | ERR3901480  |
| 81 | MEX45H_2005 | Mexico | 2005 | Human       | ERR3901484  |
| 82 | MEX46H_2004 | Mexico | 2004 | Human       | ERR3901491  |
| 83 | MEX63S_2004 | Mexico | 2004 | Swine       | ERR3901497  |
| 84 | MEX47H_2005 | Mexico | 2005 | Human       | ERR3901500  |
| 85 | MEX64S_2003 | Mexico | 2003 | Swine       | ERR3901506  |

|     |             |                |      |           |                 |
|-----|-------------|----------------|------|-----------|-----------------|
| 86  | MEX04C_2003 | Mexico         | 2003 | Chicken   | ERR4399209      |
| 87  | MEX48H_2003 | Mexico         | 2003 | Human     | ERR4400263      |
| 88  | MEX49H_2004 | Mexico         | 2004 | Human     | ERR4400784      |
| 89  | MEX66B_2004 | Mexico         | 2004 | Bovine    | SAL_UA1479AA_AS |
| 90  | MEX67H_2002 | Mexico         | 2002 | Human     | SAL_UA1639AA_AS |
| 91  | MEX65B_2003 | Mexico         | 2003 | Bovine    | SAL_UA1633AA_AS |
| 92  | MEX50H_2005 | Mexico         | 2005 | Human     | GCF_001006525   |
| 93  | MEX51H_2011 | Mexico         | 2011 | Human     | GCF_001293505   |
| 94  | MEX02B_2004 | Mexico         | 2004 | Bovine    | GCF_009497835   |
| 95  | MEX03B_2004 | Mexico         | 2004 | Bovine    | GCF_009497855   |
| 96  | MEX52H_2007 | Mexico         | 2007 | Human     | GCF_011304815   |
| 97  | NET01H_2009 | Netherlands    | 2009 | Human     | ERR4400176      |
| 98  | POR01F_1965 | Portugal       | 1965 | Food      | SAL_IA6848AA_AS |
| 99  | POR02F_1967 | Portugal       | 1967 | Food      | SAL_IA6884AA_AS |
| 100 | THA02H_2003 | Thailand       | 2003 | Human     | SRR1106424      |
| 101 | THA03H_2002 | Thailand       | 2002 | Human     | SRR1840679      |
| 102 | THA01C_2019 | Thailand       | 2019 | Chicken   | SRR14011968     |
| 103 | UK02H_2004  | United Kingdom | 2004 | Human     | ERR2719837      |
| 104 | UK16H_2012  | United Kingdom | 2012 | Human     | SRR1645887      |
| 105 | UK17H_2014  | United Kingdom | 2014 | Human     | SRR1957801      |
| 106 | UK18H_2014  | United Kingdom | 2014 | Human     | SRR1957825      |
| 107 | UK20H_2014  | United Kingdom | 2014 | Human     | SRR1965680      |
| 108 | UK21_2014   | United Kingdom | 2014 | ND/Others | SRR1967397      |
| 109 | UK22H_2014  | United Kingdom | 2014 | Human     | SRR1967622      |
| 110 | UK23H_2014  | United Kingdom | 2014 | Human     | SRR1968141      |
| 111 | UK25H_2015  | United Kingdom | 2015 | Human     | SRR1969768      |
| 112 | UK27_2015   | United Kingdom | 2015 | ND/Others | SRR3286840      |
| 113 | UK28H_2015  | United Kingdom | 2015 | Human     | SRR3322115      |
| 114 | UK29H_2017  | United Kingdom | 2017 | Human     | SRR5584700      |
| 115 | UK30H_2015  | United Kingdom | 2015 | Human     | SRR6062349      |
| 116 | UK31H_2015  | United Kingdom | 2015 | Human     | SRR6074595      |
| 117 | UK32H_2015  | United Kingdom | 2015 | Human     | SRR6111080      |
| 118 | UK33H_2018  | United Kingdom | 2018 | Human     | SRR7090670      |
| 119 | UK34H_2016  | United Kingdom | 2016 | Human     | SRR7159857      |
| 120 | UK35H_2018  | United Kingdom | 2018 | Human     | SRR7215972      |
| 121 | UK36H_2016  | United Kingdom | 2016 | Human     | SRR7286838      |
| 122 | UK38H_2018  | United Kingdom | 2018 | Human     | SRR7402355      |
| 123 | UK39H_2017  | United Kingdom | 2017 | Human     | SRR7408361      |
| 124 | UK40H_2017  | United Kingdom | 2017 | Human     | SRR7444204      |
| 125 | UK41H_2018  | United Kingdom | 2018 | Human     | SRR7451170      |
| 126 | UK42H_2017  | United Kingdom | 2017 | Human     | SRR7516730      |
| 127 | UK43H_2018  | United Kingdom | 2018 | Human     | SRR7828239      |
| 128 | UK44H_2018  | United Kingdom | 2018 | Human     | SRR7828437      |
| 129 | UK45H_2018  | United Kingdom | 2018 | Human     | SRR7850686      |

|     |             |                |      |             |                 |
|-----|-------------|----------------|------|-------------|-----------------|
| 130 | UK46H_2018  | United Kingdom | 2018 | Human       | SRR7867043      |
| 131 | UK47H_2018  | United Kingdom | 2018 | Human       | SRR7879573      |
| 132 | UK48H_2018  | United Kingdom | 2018 | Human       | SRR7910405      |
| 133 | UK49H_2018  | United Kingdom | 2018 | Human       | SRR7962214      |
| 134 | UK50H_2017  | United Kingdom | 2017 | Human       | SRR8548892      |
| 135 | UK51H_2017  | United Kingdom | 2017 | Human       | SRR8553861      |
| 136 | UK52F_2016  | United Kingdom | 2016 | Food        | SRR8658156      |
| 137 | UK53H_2019  | United Kingdom | 2019 | Human       | SRR9054604      |
| 138 | UK54H_2019  | United Kingdom | 2019 | Human       | SRR9261071      |
| 139 | UK55H_2019  | United Kingdom | 2019 | Human       | SRR9719498      |
| 140 | UK04H_2000  | United Kingdom | 2000 | Human       | ERR2693688      |
| 141 | UK01H_2001  | United Kingdom | 2001 | Human       | ERR2693713      |
| 142 | UK03H_2003  | United Kingdom | 2003 | Human       | ERR4399105      |
| 143 | UK05H_2019  | United Kingdom | 2019 | Human       | SRR10519589     |
| 144 | UK06H_2019  | United Kingdom | 2019 | Human       | SRR10519615     |
| 145 | UK07H_2019  | United Kingdom | 2019 | Human       | SRR10561173     |
| 146 | UK08H_2019  | United Kingdom | 2019 | Human       | SRR10600365     |
| 147 | UK09H_2019  | United Kingdom | 2019 | Human       | SRR10810736     |
| 148 | UK10H_2020  | United Kingdom | 2020 | Human       | SRR10900167     |
| 149 | UK11H_2020  | United Kingdom | 2020 | Human       | SRR11041608     |
| 150 | UK12H_2021  | United Kingdom | 2021 | Human       | SRR13485880     |
| 151 | UK13_2018   | United Kingdom | 2018 | ND/Others   | SRR15366175     |
| 152 | UK14H_2016  | United Kingdom | 2016 | Human       | SRR15370189     |
| 153 | UK15H_2021  | United Kingdom | 2021 | Human       | SRR16134724     |
| 154 | UK19H_2014  | United Kingdom | 2014 | Human       | SRR1958128      |
| 155 | UK24H_2014  | United Kingdom | 2014 | Human       | SRR1968540      |
| 156 | UK26H_2014  | United Kingdom | 2014 | Human       | SRR1970253      |
| 157 | UK37H_2016  | United Kingdom | 2016 | Human       | SRR7359015      |
| 158 | UK64Wa_2009 | United Kingdom | 2009 | Wild Animal | SRR17893191     |
| 159 | UK63H_2019  | United Kingdom | 2019 | Human       | SAL_SB9289AA_AS |
| 160 | UK60H_2016  | United Kingdom | 2016 | Human       | SAL_AB5684AA_AS |
| 161 | UK61H_2017  | United Kingdom | 2017 | Human       | SAL_BB4395AA_AS |
| 162 | UK62H_2017  | United Kingdom | 2017 | Human       | SAL_JB1106AA_AS |
| 163 | UK56F_2016  | United Kingdom | 2016 | Food        | SAL_CB6634AA_AS |
| 164 | UK57_2018   | United Kingdom | 2018 | ND/Others   | SAL_ZA4977AA_AS |
| 165 | UK58_2018   | United Kingdom | 2018 | ND/Others   | SAL_BB3548AA_AS |
| 166 | UK59F_2016  | United Kingdom | 2016 | Food        | SAL_CB6630AA_AS |
| 167 | US01S_1999  | United States  | 1999 | Swine       | SRR10063260     |
| 168 | US05S_2006  | United States  | 2006 | Swine       | SRR1212306      |
| 169 | US06S_2003  | United States  | 2003 | Swine       | SRR1272873      |
| 170 | US07B_2020  | United States  | 2020 | Bovine      | SRR12899007     |
| 171 | US08S_2000  | United States  | 2000 | Swine       | SRR13024097     |
| 172 | US09_2020   | United States  | 2020 | ND/Others   | SRR13221214     |
| 173 | US13H_2007  | United States  | 2007 | Human       | SRR1840738      |

|     |            |               |      |           |                 |
|-----|------------|---------------|------|-----------|-----------------|
| 174 | US14S_2006 | United States | 2006 | Swine     | SRR2532791      |
| 175 | US15S_2015 | United States | 2015 | Swine     | SRR2648752      |
| 176 | US16H_2012 | United States | 2012 | Human     | SRR3097408      |
| 177 | US17H_2011 | United States | 2011 | Human     | SRR3097427      |
| 178 | US18H_2010 | United States | 2010 | Human     | SRR3097562      |
| 179 | US19H_2011 | United States | 2011 | Human     | SRR3097569      |
| 180 | US20H_2015 | United States | 2015 | Human     | SRR3232066      |
| 181 | US21H_2015 | United States | 2015 | Human     | SRR3232068      |
| 182 | US22H_2015 | United States | 2015 | Human     | SRR3233166      |
| 183 | US23H_2014 | United States | 2014 | Human     | SRR4420901      |
| 184 | US24H_2016 | United States | 2016 | Human     | SRR5081545      |
| 185 | US25H_2017 | United States | 2017 | Human     | SRR5336307      |
| 186 | US26H_2016 | United States | 2016 | Human     | SRR5361040      |
| 187 | US27H_2017 | United States | 2017 | Human     | SRR5418841      |
| 188 | US28H_2012 | United States | 2012 | Human     | SRR5573114      |
| 189 | US29S_2017 | United States | 2017 | Swine     | SRR5576032      |
| 190 | US30H_2017 | United States | 2017 | Human     | SRR5605850      |
| 191 | US31H_2017 | United States | 2017 | Human     | SRR5628564      |
| 192 | US32H_2017 | United States | 2017 | Human     | SRR5876908      |
| 193 | US34H_2017 | United States | 2017 | Human     | SRR6334793      |
| 194 | US35H_2014 | United States | 2014 | Human     | SRR6491048      |
| 195 | US36H_2014 | United States | 2014 | Human     | SRR6685032      |
| 196 | US37H_2015 | United States | 2015 | Human     | SRR6685073      |
| 197 | US38H_2017 | United States | 2017 | Human     | SRR6750589      |
| 198 | US39H_2018 | United States | 2018 | Human     | SRR6879627      |
| 199 | US40_2018  | United States | 2018 | Human     | SRR6885440      |
| 200 | US41P_1957 | United States | 1957 | Poultry   | SRR7084742      |
| 201 | US42H_2012 | United States | 2012 | Human     | SRR8435362      |
| 202 | US43H_2011 | United States | 2011 | Human     | SRR8435708      |
| 203 | US44H_2010 | United States | 2010 | Human     | SRR8435716      |
| 204 | US45H_2010 | United States | 2010 | Human     | SRR8435722      |
| 205 | US46H_2010 | United States | 2010 | Human     | SRR8597284      |
| 206 | US47H_2017 | United States | 2017 | Human     | SRR8832720      |
| 207 | US48S_2006 | United States | 2006 | Swine     | SRR949413       |
| 208 | US02S_1999 | United States | 1999 | Swine     | SRR10063300     |
| 209 | US03H_2007 | United States | 2007 | Human     | SRR1133231      |
| 210 | US04S_2002 | United States | 2002 | Swine     | SRR11457455     |
| 211 | US10_2021  | United States | 2021 | ND/Others | SRR15257871     |
| 212 | US11S_2003 | United States | 2003 | Swine     | SRR1539626      |
| 213 | US12B_2021 | United States | 2021 | Bovine    | SRR16976151     |
| 214 | US33C_1988 | United States | 1988 | Canine    | SRR6311308      |
| 215 | US49B_2019 | United States | 2019 | Bovine    | SAL_BC0558AA_AS |
| 216 | US51S_2002 | United States | 2002 | Swine     | SAL_EC9748AA_AS |
| 217 | US52S_2002 | United States | 2002 | Swine     | SAL_EC9744AA_AS |

|     |            |               |      |        |                 |
|-----|------------|---------------|------|--------|-----------------|
| 218 | US53S_2002 | United States | 2002 | Swine  | SAL_FC0153AA_AS |
| 219 | US54S_2003 | United States | 2003 | Swine  | SAL_FC0279AA_AS |
| 220 | US50B_2020 | United States | 2020 | Bovine | SAL_KC7851AA_AS |

---

Note: <sup>1</sup>ND, non-determined

**Supplementary Table S2.** Data of the ST213 genotype draft genomes obtained from Enterobase<sup>1</sup>.

| No. | Sample      | Accession No.<br>/Assembly Barcode | Genome Length <sup>2</sup> | No. Contigs | N50     | Largest Contig | AvgContigLen <sup>3</sup> |
|-----|-------------|------------------------------------|----------------------------|-------------|---------|----------------|---------------------------|
| 1   | AUS04_2021  | SAL_PC2750AA_AS                    | 4841509                    | 187         | 59979   | 244544         | 25890                     |
| 2   | CAN17H_2008 | SAL_KC5843AA_AS                    | 5009731                    | 64          | 334376  | 881602         | 78277                     |
| 3   | CAN18H_2010 | SAL_KC5864AA_AS                    | 4963062                    | 61          | 376801  | 802111         | 81361                     |
| 4   | CAN21H_2018 | SAL_OC2346AA_AS                    | 4887527                    | 80          | 276895  | 684657         | 61094                     |
| 5   | CAN20H_2017 | SAL_RC8451AA_AS                    | 4967271                    | 72          | 394003  | 881829         | 68989                     |
| 6   | FRA01H_2019 | SAL_MC3552AA_AS                    | 4920430                    | 69          | 177888  | 570640         | 71310                     |
| 7   | FRA02H_2019 | SAL_MC3509AA_AS                    | 4902545                    | 138         | 66077   | 313196         | 35525                     |
| 8   | IRE02H_2016 | SAL_OA1032AA_AS                    | 4827944                    | 67          | 223598  | 698801         | 72058                     |
| 9   | MEX66B_2004 | SAL_UA1479AA_AS                    | 5002191                    | 53          | 301495  | 698272         | 94380                     |
| 10  | MEX67H_2002 | SAL_UA1639AA_AS                    | 5083011                    | 65          | 394092  | 881604         | 78200                     |
| 11  | MEX65B_2003 | SAL_UA1633AA_AS                    | 5109605                    | 63          | 393714  | 881420         | 81104                     |
| 12  | MEX50H_2005 | GCF_001006525                      | 5190370                    | 8           | 4886081 | 4886081        | 648796                    |
| 13  | MEX51H_2011 | GCF_001293505                      | 5088186                    | 4           | 4809574 | 4809574        | 1272046                   |
| 14  | MEX02B_2004 | GCF_009497835                      | 5096576                    | 4           | 4837346 | 4837346        | 1274144                   |
| 15  | MEX03B_2004 | GCF_009497855                      | 5060451                    | 6           | 4764173 | 4764173        | 843408                    |
| 16  | MEX52H_2007 | GCF_011304815                      | 5113293                    | 5           | 4863742 | 4863742        | 1022658                   |
| 17  | POR01F_1965 | SAL_IA6848AA_AS                    | 4880496                    | 57          | 376801  | 683163         | 85622                     |
| 18  | POR02F_1967 | SAL_IA6884AA_AS                    | 4842310                    | 73          | 195060  | 498144         | 66333                     |
| 19  | UK63H_2019  | SAL_SB9289AA_AS                    | 4825282                    | 64          | 198811  | 635641         | 75395                     |
| 20  | UK60H_2016  | SAL_AB5684AA_AS                    | 4872229                    | 149         | 107756  | 324799         | 32699                     |
| 21  | UK61H_2017  | SAL_BB4395AA_AS                    | 4762122                    | 144         | 108315  | 327435         | 33070                     |
| 22  | UK62H_2017  | SAL_JB1106AA_AS                    | 4779598                    | 107         | 87158   | 392483         | 44669                     |
| 23  | UK56F_2016  | SAL_CB6634AA_AS                    | 5064442                    | 92          | 225728  | 451048         | 55048                     |
| 24  | UK57_2018   | SAL_ZA4977AA_AS                    | 4935995                    | 72          | 223707  | 699340         | 68555                     |
| 25  | UK58_2018   | SAL_BB3548AA_AS                    | 4876068                    | 68          | 351396  | 746587         | 71706                     |
| 26  | UK59F_2016  | SAL_CB6630AA_AS                    | 4867593                    | 74          | 246550  | 630437         | 65778                     |
| 27  | US49B_2019  | SAL_BC0558AA_AS                    | 4891355                    | 113         | 91629   | 380793         | 43286                     |
| 28  | US51S_2002  | SAL_EC9748AA_AS                    | 4926650                    | 102         | 282557  | 843495         | 48300                     |
| 29  | US52S_2002  | SAL_EC9744AA_AS                    | 4935341                    | 154         | 162197  | 357102         | 32047                     |
| 30  | US53S_2002  | SAL_FC0153AA_AS                    | 4896274                    | 95          | 260444  | 424211         | 51539                     |
| 31  | US54S_2003  | SAL_FC0279AA_AS                    | 4796988                    | 68          | 376786  | 843658         | 70543                     |
| 32  | US50B_2020  | SAL_KC7851AA_AS                    | 4775207                    | 63          | 376487  | 777577         | 75796                     |

Notes: <sup>1</sup>Most of the genomes were obtained with Illumina platform, except GCF\_001006525, with PacBio; 454; Illumina GAIIx; GCF\_001293505, with PacBio RS; GCF\_009497835, with PacBio RSII; GCF\_009497855 and GCF\_01130481, with Oxford Nanopore MinION. <sup>2</sup>Obtained by TORMES; <sup>3</sup>AvgContigLen = Average Contig Length.

**Supplementary Table S3.** Data of the ST213 genotype draft genomes assembled in this work.

| No. | Sample      | Accession No. | Genome Length | No. Contigs | N50    | Largest Contig | AvgContigLen <sup>1</sup> |
|-----|-------------|---------------|---------------|-------------|--------|----------------|---------------------------|
| 1   | AUS01H_2017 | SRR14143603   | 5005729       | 103         | 713682 | 224020         | 48599                     |
| 2   | AUS02H_2018 | SRR14145155   | 4783219       | 66          | 506183 | 195937         | 72473                     |
| 3   | AUS03H_2006 | SRR5090724    | 4868786       | 145         | 376140 | 117021         | 33577                     |
| 4   | BEL01H_2020 | ERR4775375    | 4914470       | 45          | 287411 | 699084         | 109210                    |
| 5   | CAN01H_2009 | SRR12712089   | 4959284       | 125         | 417030 | 118966         | 39674                     |
| 6   | CAN02H_2018 | SRR13426370   | 4888923       | 107         | 611176 | 223641         | 45690                     |
| 7   | CAN03H_2011 | SRR13605059   | 4939010       | 91          | 444440 | 179928         | 54274                     |
| 8   | CAN04H_2008 | SRR13769784   | 5139077       | 163         | 431220 | 100074         | 31528                     |
| 9   | CAN05H_2017 | SRR13827060   | 4737356       | 86          | 464039 | 190984         | 55085                     |
| 10  | CAN06H_2017 | SRR13849853   | 4744496       | 104         | 376801 | 190984         | 45620                     |
| 11  | CAN07H_2017 | SRR13952785   | 4870261       | 94          | 405182 | 258927         | 51811                     |
| 12  | CAN08H_2017 | SRR13952800   | 4741452       | 100         | 579139 | 282799         | 47414                     |
| 13  | CAN09H_2018 | SRR14102894   | 4889645       | 94          | 690747 | 282799         | 52017                     |
| 14  | CAN10H_2018 | SRR14102906   | 4977996       | 94          | 690745 | 376801         | 52957                     |
| 15  | CAN11H_2018 | SRR14767203   | 4986889       | 87          | 881786 | 376801         | 57320                     |
| 16  | CAN12H_2017 | SRR15242717   | 5044018       | 88          | 880527 | 282999         | 57318                     |
| 17  | CAN13H_2015 | SRR15242758   | 4925887       | 71          | 880465 | 301268         | 69378                     |
| 18  | CAN14H_2016 | SRR15242930   | 4888133       | 79          | 881419 | 393714         | 61875                     |
| 19  | CAN15H_2014 | SRR15242943   | 5090233       | 79          | 881601 | 377931         | 64433                     |
| 20  | CAN16H_2014 | SRR15242946   | 4937121       | 79          | 881417 | 393714         | 62495                     |
| 21  | CAN19H_2016 | SRR15242716   | 4926622       | 232         | 192201 | 56233          | 21235                     |
| 22  | DEN01H_2002 | ERR2719681    | 4984481       | 182         | 750054 | 255860         | 27387                     |
| 23  | DEN02H_2011 | ERR2729121    | 4857281       | 162         | 520999 | 213830         | 29983                     |
| 24  | DEN03H_2009 | ERR2729149    | 5148477       | 53          | 223258 | 690860         | 97141                     |
| 25  | DEN04H_2017 | ERR2849935    | 4871803       | 116         | 506473 | 164553         | 41998                     |
| 26  | DEN05H_2009 | ERR3060821    | 5144940       | 51          | 274130 | 809358         | 100881                    |
| 27  | DEN06H_2008 | ERR3901222    | 5009163       | 49          | 243737 | 717899         | 102227                    |
| 28  | IND01F_2011 | SRR1107438    | 4899621       | 114         | 699340 | 255941         | 42979                     |
| 29  | IND02F_2010 | SRR1300736    | 4844434       | 97          | 699340 | 198572         | 49942                     |
| 30  | IND03F_2015 | SRR2029592    | 4882663       | 189         | 699340 | 213930         | 25834                     |
| 31  | IRE01H_2007 | ERR2693630    | 4821095       | 34          | 323073 | 549620         | 141796                    |
| 32  | MEX01B_2004 | ERR2719833    | 5073584       | 213         | 628512 | 282373         | 23819                     |
| 33  | MEX04C_2003 | ERR4399209    | 5047407       | 67          | 301232 | 628447         | 75334                     |
| 34  | MEX05D_2019 | SRR11029506   | 4847992       | 83          | 819000 | 246039         | 58409                     |
| 35  | MEX06D_2019 | SRR11029518   | 4851815       | 83          | 628510 | 218638         | 58455                     |
| 36  | MEX07D_2019 | SRR11029520   | 4849629       | 82          | 818999 | 282777         | 59141                     |
| 37  | MEX08D_2019 | SRR11029523   | 4851671       | 82          | 628678 | 223363         | 59166                     |
| 38  | MEX09D_2019 | SRR11029528   | 4852917       | 88          | 880793 | 223363         | 55146                     |
| 39  | MEX10D_2019 | SRR11029530   | 4851087       | 75          | 804935 | 223363         | 64681                     |
| 40  | MEX11F_2005 | SRR6010020    | 4984709       | 97          | 690745 | 297919         | 51388                     |
| 41  | MEX12F_2004 | SRR9017255    | 5149322       | 156         | 698621 | 183055         | 33008                     |
| 42  | MEX13F_2004 | SRR9102687    | 5077540       | 123         | 684646 | 196723         | 41280                     |

|    |             |             |         |     |        |        |        |
|----|-------------|-------------|---------|-----|--------|--------|--------|
| 43 | MEX24H_2003 | ERR2693572  | 5090293 | 57  | 246638 | 498032 | 89303  |
| 44 | MEX25H_2005 | ERR2693575  | 5053940 | 81  | 238479 | 498021 | 62394  |
| 45 | MEX26H_2003 | ERR2693961  | 5226363 | 172 | 862980 | 376701 | 30385  |
| 46 | MEX27H_2005 | ERR2693974  | 5184205 | 63  | 301234 | 578153 | 82288  |
| 47 | MEX28H_2003 | ERR2693981  | 5055607 | 51  | 340697 | 818845 | 99129  |
| 48 | MEX29H_2003 | ERR2710803  | 5103298 | 53  | 376541 | 818964 | 96288  |
| 49 | MEX30H_2004 | ERR2710805  | 5011626 | 45  | 335267 | 818986 | 111369 |
| 50 | MEX31H_2002 | ERR2710819  | 5042977 | 58  | 282644 | 880998 | 86947  |
| 51 | MEX32H_2003 | ERR2710835  | 5214099 | 59  | 335267 | 595479 | 88374  |
| 52 | MEX33H_2004 | ERR2710854  | 5062610 | 57  | 282961 | 628497 | 88817  |
| 53 | MEX34H_2003 | ERR2710856  | 5121709 | 53  | 376541 | 819028 | 96636  |
| 54 | MEX35H_2003 | ERR2710865  | 5060644 | 53  | 376541 | 880997 | 95483  |
| 55 | MEX36H_2003 | ERR2710869  | 5042111 | 70  | 137483 | 366728 | 72030  |
| 56 | MEX37H_2004 | ERR2710884  | 4890507 | 41  | 228871 | 577382 | 119280 |
| 57 | MEX38H_2004 | ERR2719629  | 5096019 | 236 | 819186 | 240337 | 21593  |
| 58 | MEX39H_2003 | ERR2719641  | 5178225 | 59  | 246700 | 595279 | 87766  |
| 59 | MEX40H_2003 | ERR2719652  | 5115286 | 230 | 819354 | 283231 | 22240  |
| 60 | MEX41H_2004 | ERR2719677  | 5024458 | 64  | 201110 | 796774 | 78507  |
| 61 | MEX42H_2004 | ERR3482042  | 5031586 | 42  | 276732 | 819018 | 119799 |
| 62 | MEX43H_2002 | ERR3482104  | 5033740 | 68  | 196368 | 628357 | 74025  |
| 63 | MEX44H_2007 | ERR3901480  | 5033592 | 42  | 282876 | 819396 | 119847 |
| 64 | MEX45H_2005 | ERR3901484  | 5036881 | 50  | 276486 | 866946 | 100737 |
| 65 | MEX46H_2004 | ERR3901491  | 5036640 | 54  | 265342 | 819203 | 93271  |
| 66 | MEX47H_2005 | ERR3901500  | 5124857 | 65  | 223076 | 577790 | 78843  |
| 67 | MEX48H_2003 | ERR4400263  | 5060979 | 60  | 246672 | 690117 | 84349  |
| 68 | MEX49H_2004 | ERR4400784  | 5090047 | 60  | 280191 | 628306 | 84834  |
| 69 | MEX53_2004  | SRR9099710  | 4994658 | 98  | 881418 | 298344 | 50965  |
| 70 | MEX54_2004  | SRR9102691  | 5020626 | 150 | 684612 | 279416 | 33470  |
| 71 | MEX55_2004  | SRR9102693  | 5224092 | 121 | 881602 | 377276 | 43174  |
| 72 | MEX56R_2019 | SRR11016193 | 4996578 | 78  | 733742 | 301490 | 64058  |
| 73 | MEX57R_2019 | SRR11028646 | 4862823 | 81  | 628512 | 196238 | 60034  |
| 74 | MEX58R_2019 | SRR11028649 | 4861711 | 77  | 716177 | 201315 | 63139  |
| 75 | MEX59R_2019 | SRR11029522 | 4852841 | 77  | 628510 | 223363 | 63023  |
| 76 | MEX60R_2019 | SRR11029526 | 4853195 | 79  | 690305 | 223363 | 61432  |
| 77 | MEX61S_2003 | ERR2693980  | 5166477 | 46  | 301234 | 595396 | 112314 |
| 78 | MEX62S_2003 | ERR3482056  | 5001881 | 55  | 301234 | 696959 | 90943  |
| 79 | MEX63S_2004 | ERR3901497  | 5012726 | 44  | 301227 | 819125 | 113925 |
| 80 | MEX64S_2003 | ERR3901506  | 5079411 | 50  | 276578 | 690121 | 101588 |
| 81 | NET01H_2009 | ERR4400176  | 4961200 | 41  | 273107 | 745306 | 121004 |
| 82 | THA01C_2019 | SRR14011968 | 4981734 | 37  | 333625 | 745908 | 134641 |
| 83 | THA02H_2003 | SRR1106424  | 4875802 | 108 | 545399 | 141530 | 45146  |
| 84 | THA03H_2002 | SRR1840679  | 4863904 | 113 | 361630 | 175502 | 43043  |
| 85 | UK01H_2001  | ERR2693713  | 4816370 | 45  | 213554 | 698735 | 107030 |
| 86 | UK02H_2004  | ERR2719837  | 5136441 | 234 | 740641 | 282373 | 21950  |

|     |            |             |         |     |        |        |        |
|-----|------------|-------------|---------|-----|--------|--------|--------|
| 87  | UK03H_2003 | ERR4399105  | 4993894 | 43  | 301104 | 610177 | 116137 |
| 88  | UK04H_2000 | ERR2693688  | 4860468 | 34  | 377353 | 681673 | 142954 |
| 89  | UK05H_2019 | SRR10519589 | 4809723 | 55  | 178073 | 506316 | 87449  |
| 90  | UK06H_2019 | SRR10519615 | 4808838 | 57  | 152759 | 506467 | 84365  |
| 91  | UK07H_2019 | SRR10561173 | 4868036 | 54  | 201920 | 627869 | 90148  |
| 92  | UK08H_2019 | SRR10600365 | 4848636 | 58  | 145075 | 377070 | 83597  |
| 93  | UK09H_2019 | SRR10810736 | 4810321 | 56  | 164066 | 506081 | 85898  |
| 94  | UK10H_2020 | SRR10900167 | 4812824 | 56  | 178078 | 377063 | 85943  |
| 95  | UK11H_2020 | SRR11041608 | 4807025 | 66  | 145071 | 330486 | 72833  |
| 96  | UK12H_2021 | SRR13485880 | 4709598 | 46  | 222922 | 547828 | 102382 |
| 97  | UK13_2018  | SRR15366175 | 4846205 | 61  | 178073 | 376487 | 79445  |
| 98  | UK14H_2016 | SRR15370189 | 4919495 | 54  | 213661 | 480882 | 91101  |
| 99  | UK15H_2021 | SRR16134724 | 4867726 | 60  | 168525 | 524400 | 81128  |
| 100 | UK16H_2012 | SRR1645887  | 5008330 | 123 | 536760 | 188144 | 40718  |
| 101 | UK17H_2014 | SRR1957801  | 4915187 | 222 | 367624 | 111333 | 22140  |
| 102 | UK18H_2014 | SRR1957825  | 4727624 | 138 | 495228 | 120281 | 34258  |
| 103 | UK19H_2014 | SRR1958128  | 4769042 | 148 | 51118  | 195382 | 32223  |
| 104 | UK20H_2014 | SRR1965680  | 4775349 | 87  | 520939 | 149344 | 54889  |
| 105 | UK21_2014  | SRR1967397  | 4769372 | 181 | 221189 | 58289  | 26350  |
| 106 | UK22H_2014 | SRR1967622  | 4972525 | 91  | 438474 | 171329 | 54643  |
| 107 | UK23H_2014 | SRR1968141  | 4716217 | 100 | 247110 | 130554 | 47162  |
| 108 | UK24H_2014 | SRR1968540  | 4914777 | 93  | 94543  | 194596 | 52847  |
| 109 | UK25H_2015 | SRR1969768  | 4765403 | 99  | 438583 | 213775 | 48135  |
| 110 | UK26H_2014 | SRR1970253  | 4911862 | 113 | 104190 | 267122 | 43467  |
| 111 | UK27_2015  | SRR3286840  | 4775822 | 72  | 506599 | 192094 | 66330  |
| 112 | UK28H_2015 | SRR3322115  | 4860815 | 98  | 506045 | 134356 | 49600  |
| 113 | UK29H_2017 | SRR5584700  | 4774223 | 113 | 255530 | 91445  | 42249  |
| 114 | UK30H_2015 | SRR6062349  | 4817828 | 87  | 506704 | 187070 | 55377  |
| 115 | UK31H_2015 | SRR6074595  | 4823317 | 88  | 506430 | 178183 | 54810  |
| 116 | UK32H_2015 | SRR6111080  | 4819431 | 87  | 506337 | 170134 | 55395  |
| 117 | UK33H_2018 | SRR7090670  | 4852645 | 78  | 398413 | 195744 | 62213  |
| 118 | UK34H_2016 | SRR7159857  | 4931502 | 91  | 442640 | 278051 | 54192  |
| 119 | UK35H_2018 | SRR7215972  | 4826826 | 93  | 506048 | 145156 | 51901  |
| 120 | UK36H_2016 | SRR7286838  | 4921493 | 81  | 627762 | 196194 | 60759  |
| 121 | UK37H_2016 | SRR7359015  | 4913045 | 119 | 84743  | 231872 | 41286  |
| 122 | UK38H_2018 | SRR7402355  | 4717468 | 58  | 818704 | 171817 | 81335  |
| 123 | UK39H_2017 | SRR7408361  | 4820570 | 86  | 320870 | 186932 | 56053  |
| 124 | UK40H_2017 | SRR7444204  | 4781053 | 64  | 506241 | 178182 | 74703  |
| 125 | UK41H_2018 | SRR7451170  | 4864252 | 95  | 506058 | 182615 | 51202  |
| 126 | UK42H_2017 | SRR7516730  | 4785033 | 84  | 506520 | 187009 | 56964  |
| 127 | UK43H_2018 | SRR7828239  | 4865649 | 63  | 404856 | 195736 | 77232  |
| 128 | UK44H_2018 | SRR7828437  | 4857716 | 109 | 320863 | 110301 | 44566  |
| 129 | UK45H_2018 | SRR7850686  | 4820031 | 85  | 506337 | 187070 | 56706  |
| 130 | UK46H_2018 | SRR7867043  | 4857683 | 86  | 470066 | 149343 | 56484  |

|     |             |             |         |     |         |        |       |
|-----|-------------|-------------|---------|-----|---------|--------|-------|
| 131 | UK47H_2018  | SRR7879573  | 4856791 | 82  | 324616  | 178183 | 59229 |
| 132 | UK48H_2018  | SRR7910405  | 4861250 | 78  | 506337  | 178183 | 62323 |
| 133 | UK49H_2018  | SRR7962214  | 4778772 | 69  | 320863  | 185520 | 69257 |
| 134 | UK50H_2017  | SRR8548892  | 4717030 | 57  | 497880  | 222576 | 82754 |
| 135 | UK51H_2017  | SRR8553861  | 4818260 | 94  | 320863  | 143281 | 51258 |
| 136 | UK52F_2016  | SRR8658156  | 4862720 | 84  | 628038  | 196210 | 57889 |
| 137 | UK53H_2019  | SRR9054604  | 4970061 | 79  | 506338  | 149529 | 62912 |
| 138 | UK54H_2019  | SRR9261071  | 4910924 | 78  | 324477  | 186932 | 62960 |
| 139 | UK55H_2019  | SRR9719498  | 4982417 | 78  | 628037  | 190277 | 63877 |
| 140 | UK64Wa_2009 | SRR17893191 | 4894539 | 60  | 178070  | 506499 | 81575 |
| 141 | US01S_1999  | SRR10063260 | 5024874 | 134 | 777921  | 184452 | 37499 |
| 142 | US02S_1999  | SRR10063300 | 4860499 | 191 | 42375   | 186524 | 25447 |
| 143 | US03H_2007  | SRR1133231  | 5397470 | 93  | 149553  | 428033 | 58037 |
| 144 | US04S_2002  | SRR11457455 | 4890263 | 78  | 158492  | 414669 | 62695 |
| 145 | US05S_2006  | SRR1212306  | 4837178 | 83  | 843679  | 377608 | 58279 |
| 146 | US06S_2003  | SRR1272873  | 4973359 | 120 | 539654  | 224390 | 41444 |
| 147 | US07B_2020  | SRR12899007 | 4954094 | 131 | 267822  | 126841 | 37817 |
| 148 | US08S_2000  | SRR13024097 | 4995418 | 85  | 683993  | 393714 | 58769 |
| 149 | US09_2020   | SRR13221214 | 5013520 | 69  | 690746  | 376800 | 72659 |
| 150 | US10_2021   | SRR15257871 | 4998408 | 55  | 222653  | 880812 | 90880 |
| 151 | US11S_2003  | SRR1539626  | 5012142 | 51  | 257511  | 683073 | 98277 |
| 152 | US12B_2021  | SRR16976151 | 4912376 | 150 | 62781   | 212495 | 32749 |
| 153 | US13H_2007  | SRR1840738  | 5116122 | 117 | 867275  | 238695 | 43727 |
| 154 | US14S_2006  | SRR2532791  | 4905444 | 85  | 843495  | 376786 | 57711 |
| 155 | US15S_2015  | SRR2648752  | 5035448 | 139 | 628524  | 196325 | 36226 |
| 156 | US16H_2012  | SRR3097408  | 4883365 | 189 | 320444  | 130556 | 25837 |
| 157 | US17H_2011  | SRR3097427  | 4941374 | 156 | 189650  | 79226  | 31675 |
| 158 | US18H_2010  | SRR3097562  | 5079692 | 118 | 604635  | 171818 | 43048 |
| 159 | US19H_2011  | SRR3097569  | 5019108 | 124 | 442288  | 195736 | 40476 |
| 160 | US20H_2015  | SRR3232066  | 5001087 | 109 | 684716  | 224308 | 45881 |
| 161 | US21H_2015  | SRR3232068  | 5001291 | 110 | 512661  | 224904 | 45466 |
| 162 | US22H_2015  | SRR3233166  | 5004137 | 117 | 587415  | 301893 | 42770 |
| 163 | US23H_2014  | SRR4420901  | 4895682 | 140 | 881603  | 398300 | 34969 |
| 164 | US24H_2016  | SRR5081545  | 4953506 | 111 | 690746  | 394010 | 44626 |
| 165 | US25H_2017  | SRR5336307  | 4939187 | 93  | 827916  | 384085 | 53109 |
| 166 | US26H_2016  | SRR5361040  | 5040741 | 82  | 628500  | 282141 | 61472 |
| 167 | US27H_2017  | SRR5418841  | 5320793 | 136 | 1321794 | 653515 | 39123 |
| 168 | US28H_2012  | SRR5573114  | 5029191 | 86  | 881418  | 394010 | 58478 |
| 169 | US29S_2017  | SRR5576032  | 5095906 | 89  | 982743  | 223102 | 57257 |
| 170 | US30H_2017  | SRR5605850  | 5095277 | 165 | 513631  | 255131 | 30880 |
| 171 | US31H_2017  | SRR5628564  | 5073878 | 100 | 687841  | 344084 | 50738 |
| 172 | US32H_2017  | SRR5876908  | 4895999 | 115 | 690745  | 321169 | 42573 |
| 173 | US33C_1988  | SRR6311308  | 4899797 | 72  | 139294  | 363992 | 68052 |
| 174 | US34H_2017  | SRR6334793  | 4961916 | 89  | 690745  | 276882 | 55751 |

|     |            |            |         |     |        |        |       |
|-----|------------|------------|---------|-----|--------|--------|-------|
| 175 | US35H_2014 | SRR6491048 | 4983159 | 188 | 268654 | 69487  | 26506 |
| 176 | US36H_2014 | SRR6685032 | 4840297 | 76  | 699340 | 224196 | 63688 |
| 177 | US37H_2015 | SRR6685073 | 5155149 | 137 | 881602 | 282799 | 37628 |
| 178 | US38H_2017 | SRR6750589 | 4967988 | 91  | 587538 | 301490 | 54593 |
| 179 | US39H_2018 | SRR6879627 | 4881798 | 178 | 639984 | 91060  | 27425 |
| 180 | US40_2018  | SRR6885440 | 5018417 | 78  | 714139 | 256424 | 64338 |
| 181 | US41P_1957 | SRR7084742 | 4800131 | 87  | 735022 | 376801 | 55173 |
| 182 | US42H_2012 | SRR8435362 | 4876948 | 73  | 690746 | 282799 | 66807 |
| 183 | US43H_2011 | SRR8435708 | 5028636 | 136 | 454104 | 109679 | 36975 |
| 184 | US44H_2010 | SRR8435716 | 5104904 | 126 | 515104 | 282800 | 40515 |
| 185 | US45H_2010 | SRR8435722 | 5098439 | 98  | 603403 | 253501 | 52024 |
| 186 | US46H_2010 | SRR8597284 | 4849920 | 80  | 690747 | 301486 | 60624 |
| 187 | US47H_2017 | SRR8832720 | 5108363 | 134 | 583607 | 192331 | 38122 |
| 188 | US48S_2006 | SRR949413  | 4908411 | 92  | 690758 | 376786 | 53352 |

---

Note: <sup>1</sup> AvgContigLen = Average Contig Length
